# Supplementary material for: Detection of Quantitative Trait Loci (QTLs) for Resistances to Small Brown Planthopper and Rice Stripe Virus in Rice Using Recombinant Inbred Lines
Source: MDPI journal article supplement (doi:10.3390/ijms14048406), 2013-04-16
Supplement: s1 [file s1]

## Sheet: Sheet1
	Table S1. RSV reactions of 312 rice varieties/landraces from various sources.
Varieties/landraces	Sub-species	Area	Reaction a
Xingguo	Japonica	Jilin	HS
Chimao	Japonica	Jilin	HS
Wuyidaozhong	Japonica	Jilin	HS
Yuanzi2	Japonica	Jilin	HS
Dajinxian	Japonica	Jilin	HS
Zaodao	Japonica	Jilin	HS
Jiuniandao	Japonica	Jilin	HS
Wutong	Japonica	Jilin	HS
Wuyoudao1	Japonica	Heilongjiang	HS
Hejiang19	Japonica	Heilongjiang	HS
Mandalu	Japonica	Heilongjiang	HS
Wangou51	Japonica	Heilongjiang	HS
Sulianzhong	Japonica	Heilongjiang	R
Hongxing1	Japonica	Heilongjiang	S
Dandongludao	Japonica	Liaoning	HS
Liaojing287	Japonica	Liaoning	S
Dongdao	Japonica	Liaoning	HS
LimingB	Japonica	Liaoning	HS
Huangnianjingzi	Japonica	Liaoning	MR
Lianmi15	Japonica	Liaoning	HS
Dasa52	Japonica	Liaoning	HS
Houzheya	Japonica	Liaoning	HS
Wulongbei5	Japonica	Liaoning	HS
Xiuyanbufujin	Japonica	Liaoning	HS
Handao	Japonica	Liaoning	MR
Zhonghua8	Japonica	Beijing	HS
Beijingjiangmidao	Japonica	Beijing	HS
Shuiyuan300li	Japonica	Hebei	HS
Jijing14	Japonica	Hebei	MR
Shengdao13	Japonica	Shandong	MR
Xiaoxiangdao	Japonica	Shandong	R
Xiangdao	Japonica	Shandong	HR
Qiushuibaidao	Japonica	Shandong	HS
Huludao	Japonica	Shandong	S
Zuozuodao	Japonica	Shandong	R
Wangsherenzhuangdumizhong	Japonica	Shandong	HS
Xiaohongmang	Japonica	Shandong	S
Nuomidao	Japonica	Shandong	MR
Jindao1	Japonica	Shanxi	HS
Jindao5	Japonica	Shanxi	R
Maguzi	Japonica	Shanxi	HS
Laohongdao	Japonica	Shanxi	HS
Jiabala	Indica	Xizang	S
Hupihuangmangdao	Japonica	Xinjiang	HS
Meihuanuo	Indica	Sichuan	HS
Zhongnong4	Indica	Sichuan	S
Sankecun	Indica	Sichuan	MR
Chengduai3	Indica	Sichuan	HS
Aimakang	Indica	Sichuan	HS
Shufeng101	Indica	Sichuan	HR
Luke3	Indica	Sichuan	MR
Magunuo	Japonica	Guizhou	HS
Maweizhan	Indica	Guizhou	HS
Xiaobaimi	Indica	Guizhou	S
Qianhui756	Indica	Guizhou	R
Qitoubaigu	Japonica	Yunnan	S
Gongju73	Japonica	Yunnan	HS
Zinuo	Indica	Yunnan	S
Jixuenuo	Japonica	Yunnan	MR
Ximaxian	Indica	Yunnan	MR
Xianggu	Japonica	Yunnan	S
Qingke	Indica	Yunnan	HR
Qitougu	Indica	Yunnan	R
Hangu	Japonica	Yunnan	S
Dianjingyou1	Japonica	Yunnan	R
Fengdao17	Japonica	Yunnan	MR
Jianjing6	Japonica	Yunnan	HS
Yundao1	Indica	Yunnan	HS
Dahongpigu	Indica	Yunnan	HS
Yunxiangjing	Japonica	Yunnan	S
Changningshilixiang	Japonica	Yunnan	HS
Xituanheigu	Japonica	Yunnan	HS
Alihuang	Japonica	Yunnan	S
Mazaoheigu	Indica	Yunnan	MR
Damagu	Indica	Yunnan	HS
Zhabopian	Indica	Yunnan	HS
Aoligong	Indica	Yunnan	HS
Kuonuogu	Indica	Yunnan	MR
Haonaihuan	Indica	Yunnan	S
Huangbansuo	Indica	Yunnan	MR
Digunuo	Indica	Yunnan	HS
Haohai	Indica	Yunnan	MR
Leihuozhan	Indica	Anhui	HS
Guangzao	Indica	Anhui	MR
Yedao	Indica	Anhui	R
Erlangzao	Indica	Anhui	R
Datoubai	Indica	Anhui	MR
Hunanxian	Indica	Anhui	R
Dayeke	Indica	Anhui	HS
Guodihei	Indica	Anhui	HS
Xiaohongdao	Indica	Anhui	MR
Bingshuihong	Indica	Anhui	R
JinghuB	Japonica	Anhui	HS
Zaoxian240	Indica	Anhui	HS
Dangyu5	Japonica	Anhui	HS
Feidongtangdao	Japonica	Anhui	HS
Wujienuo	Japonica	Anhui	S
Zaoxian14	Indica	Anhui	MR
Zuqing	Indica	Anhui	HS
Jizuichuan	Indica	Anhui	S
Diaosiji	Japonica	Anhui	R
Nanxibai	Japonica	Anhui	R
Jiefangxian	Indica	Jiangxi	MR
Sanbaili	Indica	Jiangxi	S
Taishannuo	Indica	Jiangxi	S
Aimi	Indica	Jiangxi	HS
Zhenshan97B	Indica	Jiangxi	S
XiangaiB	Indica	Jiangxi	HS
Jiangnongzao1B	Indica	Jiangxi	S
Nante	Indica	Jiangxi	S
Ce64	Indica	Jiangxi	S
Changlixian	Indica	Jiangxi	HS
9194	Indica	Jiangxi	S
Ganwanxian30	Indica	Jiangxi	R
Hongkenuo	Indica	Jiangxi	S
Luweizhuang	Indica	Jiangxi	HS
Guodongqing	Indica	Jiangxi	R
Bawangbian1	Japonica	Hubei	HS
Huangjinnuo	Japonica	Hubei	HS
Waibaodan(1)	Japonica	Hubei	HS
Liuyezhan	Indica	Hubei	S
Yienchangtanqingzhan	Indica	Hubei	HS
Xiangling628S	Indica	Hunan	MR
Aijiaozao	Indica	Hunan	R
Xugunuo	Japonica	Hunan	R
Wanlixian	Indica	Hunan	R
Baoxie123B	Indica	Hunan	MR
Baoxie-7B	Indica	Hunan	HS
Xianghui91269	Indica	Hunan	HR
Xiangaizao10	Indica	Hunan	S
Xiangwanxian1	Indica	Hunan	R
Xiangwanxian3	Indica	Hunan	HR
Xiangzaoxian7	Indica	Hunan	R
Zhonggu	Indica	Hunan	HR
Hongmaonuogu	Indica	Hunan	R
Xinning	Indica	Hunan	MR
Chongyangzhangzinuo	Indica	Hunan	MR
Esiniu	Indica	Guangdong	MR
Nanxiongzaoyouzhan	Indica	Guangdong	HS
Baikehualuo	Indica	Guangdong	HS
Heidu4	Indica	Guangdong	S
Qingsiai16B	Indica	Guangdong	R
Guangluai4	Indica	Guangdong	HS
Aijiaonante	Indica	Guangdong	S
Huangsiguizhan	Indica	Guangdong	R
YuefengB	Indica	Guangdong	R
Dongbeilao	Indica	Guangdong	HS
Puningchishujiebai	Indica	Guangdong	HS
Chazhan	Indica	Guangdong	HS
Zhongdaxinxingbai	Indica	Guangdong	S
Zaozaohe	Indica	Guangdong	MR
Daliannanzhong	Indica	Guangdong	HS
Liusha1	Indica	Guangxi	MR
Guangluai15-1	Indica	Guangxi	HS
Hengxianliangchunbeigu	Indica	Guangxi	HS
Zaoshuxiangheimi	Indica	Guangxi	R
Madagu	Indica	Guangxi	S
Daganhong	Indica	Guangxi	S
Zhongdafei	Indica	Guangxi	R
Qiaizhan	Indica	Guangxi	MR
Yinguainuo	Indica	Guangxi	HS
Manggu	Indica	Guangxi	S
Luopishizhaizhuang	Indica	Guangxi	S
Zhongzuoyouzhongluhe	Indica	Guangxi	S
Menjiagao1	Japonica	Hainan	HR
Menjiading2	Indica	Hainan	R
Jinyou1	Indica	Fujian	R
Mancang515	Indica	Fujian	S
Jiahezaozhan	Indica	Fujian	R
LongtepuB	Indica	Fujian	HS
Shijihuangzhan	Indica	Fujian	MR
Chonganbai	Indica	Fujian	HS
Huangzhinuo	Indica	Fujian	R
Huangmizi	Indica	Fujian	R
Zaohonggu	Indica	Fujian	S
Zaobaimi	Indica	Fujian	R
Zaonuo	Indica	Fujian	HS
Zhong9B	Indica	Zhejiang	MR
Zaoxianmi	Indica	Zhejiang	R
Zhejing61	Japonica	Zhejiang	S
Huagu	Indica	Zhejiang	R
Zhejing5	Japonica	Zhejiang	HS
Xianghu301	Japonica	Zhejiang	HS
Hujing75	Japonica	Zhejiang	MR
Jia0664	Japonica	Zhejiang	HS
Jiahua1	Japonica	Zhejiang	R
Qiushui21	Japonica	Zhejiang	R
Qiushui04	Japonica	Zhejiang	S
Yuejing618	Japonica	Zhejiang	HS
Zhaonuo9714	Japonica	Zhejiang	S
Tieganqing(huangke)	Indica	Zhejiang	S
Wuzuiwan	Indica	Zhejiang	HS
88B	Indica	Jiangsu	R
9311	Indica	Jiangsu	HR
Ninghui21	Japonica	Jiangsu	MR
Zhenxian232	Indica	Jiangsu	R
Suxiangjing2	Japonica	Jiangsu	R
Wunongzao	Japonica	Jiangsu	HS
Wufujing	Japonica	Jiangsu	HS
Xudao3	Japonica	Jiangsu	R
Lianjing3	Japonica	Jiangsu	R
Yanjing5	Japonica	Jiangsu	HS
Haidao9	Japonica	Jiangsu	MR
Wuyujing3	Japonica	Jiangsu	HS
Taizhong65	Japonica	Taiwan	HS
Taizhongzailai1	Indica	Taiwan	HS
Taizhongxianxuan220	Indica	Taiwan	S
Taidongludao328	Japonica	Taiwan	HS
Gaoxiongyu122	Japonica	Taiwan	HS
Dijiaowujian	Indica	Taiwan	S
Tainong34	Japonica	Taiwan	S
Jianongyu257	Japonica	Taiwan	HS
Taizhongxiannuo1	Indica	Taiwan	HS
Jianan8	Japonica	Taiwan	HS
Tainan9	Japonica	Taiwan	MR
Taidongyu66	Japonica	Taiwan	R
Sujing2	Japonica	Taihu	HS
Xiangjingnuo	Japonica	Taihu	HS
Xixiangjing1	Japonica	Taihu	S
Huangdao	Indica	Taihu	HS
Shuangfeng2	Japonica	Taihu	S
Sujing5	Japonica	Taihu	HS
Jianan2	Japonica	Taihu	S
Xidao11	Japonica	Taihu	R
Shuanghu4	Japonica	Taihu	MR
Aijing10	Japonica	Taihu	HS
Lianjing8671	Japonica	Taihu	MR
Sujing3	Japonica	Taihu	HS
Guihuahuang	Japonica	Taihu	HS
Jingxi103	Japonica	Taihu	S
Sujing4	Japonica	Taihu	R
Zijinjing	Japonica	Taihu	R
Guihuanuo	Japonica	Taihu	S
Jingxi103	Japonica	Taihu	HS
Xiangxian	Indica	Taihu	R
Tongkejing	Japonica	Taihu	HS
Zhongwu7	Japonica	Taihu	R
Yaxuenuo	Japonica	Taihu	R
Suyunuo	Japonica	Taihu	S
Kuidao	Japonica	Taihu	S
Jiahe1	Japonica	Taihu	HS
Qianxiaohangu	Japonica	Taihu	S
Yangliuhangu	Japonica	Taihu	S
Chenggonghangu	Japonica	Taihu	HS
Heikezijing	Japonica	Taihu	HS
Zhendao2	Japonica	Taihu	HS
Zhengdao1	Japonica	Taihu	R
Nonglin8	Japonica	Taihu	HS
Youmangzaodao	Japonica	Taihu	HS
Lizhihong	Japonica	Taihu	HS
Shuangfeng4	Japonica	Taihu	MR
IR56	Indica	IRRI	MR
IR58	Indica	IRRI	R
IR60	Indica	IRRI	R
IR8	Indica	IRRI	R
IR20	Indica	IRRI	HR
IR26	Indica	IRRI	R
IR28	Indica	IRRI	R
IR36	Indica	IRRI	MR
IR64	Indica	IRRI	HR
IR97-7	Indica	IRRI	S
IR29	Indica	IRRI	MR
IR69628B	Indica	IRRI	HS
IR68275B	Indica	IRRI	MR
IR112-12	Indica	IRRI	HR
IR1529-680-3	Indica	IRRI	R
IR13427-40-2-2-3	Indica	IRRI	S
IR1561-228-3-3	Indica	IRRI	MR
IR2031-354-2-3	Indica	IRRI	MR
IR2153-14-1-6	Indica	IRRI	R
IR13423-17-1-2-1	Indica	IRRI	HR
USSR5	Japonica	Russia	S
N22	Indica	India	HR
DJ99	Indica	India	R
Dumai	Indica	India	MR
Getu	Indica	India	R
Shoufenguang	Japonica	Japan	S
Fengjin	Japonica	Japan	HS
Yiweidao	Japonica	South Korea	HS
Zhouandao	Japonica	South Korea	S
Huadongdao	Japonica	South Korea	MR
Lili327	Indica	South Korea	MR
Miyang23	Indica	South Korea	MR
Miyang46	Indica	South Korea	R
Si Lau(A)	Japonica	Malaysia	R
Belao	Japonica	Malaysia	S
Radi Pagalou	Japonica	Malaysia	S
Muda	Indica	Malaysia	MR
Malaixizi	Indica	Malaysia	S
Jingnong1	Indica	Malaysia	HS
Aen Petu	Japonica	Indonesia	MR
Ase Pulu Ceba	Japonica	Indonesia	HS
Gropak U1	Indica	Indonesia	R
Gundi1 Ku	Indica	Indonesia	MR
Major	Indica	Indonesia	R
Qundut	Japonica	Philippine	HS
Qutube-n	Japonica	Philippine	S
Davao 2	Indica	Philippine	MR
Fei51	Indica	Philippine	R
xx-4	Japonica	Thailand	R
Ku101	Japonica	Thailand	HS
Niaw Ma-dan	Japonica	Thailand	S
Gnen Fai	Indica	Thailand	S
RD21	Indica	Thailand	S
GZ 2175-5-6	Japonica	Egypt	HS
E 425	Japonica	Senegal	MR
IRAT 10	Japonica	Cote d'lvoire	HS
CLCA-7	Indica	Zambia	R
Se-3029	Indica	Zambia	HS
1343	Indica	Madagascar	HS
Vary Lava	Indica	Madagascar	MR
G8	Indica	Congo	R
a I, immune; HR, highly resistant; R, resistant; MR, moderately resistant; S, susceptible; and HS, highly susceptible.
